# Supplementary material for: Calcium and bicarbonate signaling pathways have pivotal, resonating roles in matching ATP production to demand
Source: eLife. 2023 Jun 5;12:e84204. doi: 10.7554/eLife.84204 (PMC10284600; doi:10.7554/eLife.84204)
Supplement: Figure 1—source data 1. [file elife-84204-fig1-data1.xlsx]

## Sheet: Figure.1B 
	sAC and ATP-synthase	F-actin and sAC	ATP-synthase and F-actin
	0.6592	-0.11664	-0.09263
	0.67079	0.08626	0.08626
	0.61435	-0.01965	-0.02921
	0.51624	-0.29064	-0.2892
	0.51683	-0.29064	-0.18528
	0.586	-0.339	-0.16686
	0.75634	-0.00314	0.11883
	0.72793	0.01816	0.09392
	0.65184	0.01816	-0.12125
	0.5733	-0.25866	-0.17952
	0.82918	0.05653	0.19919
	0.83235	0.00771	0.10414
Mean	0.661196	-0.0942958	-0.0384675
SEM	0.0312165	0.0451785	0.0448328

## Sheet: Figure.1E
	sAC	ATP-synthase	F-actin	ATP-synthase and F-actin	F-actin and sAC	sAC and ATP-synthase
	1.16554	1.15767	1.13404	0.4479	0.42035	0.0964875
	1.00017	0.945029	1.09467	0.392775	0.42035	0.12405
	1.07891	0.8584	1.00017	0.401614	0.40655	0.1575
	1.00017	1.03954	0.913529	0.427237	0.372125	0.0826875
	0.756029	0.748157	0.779657	0.310088	0.275637	0.0964625
	0.693014	0.874157	0.945043	0.504	0.504014	0.151613
	0.874171	1.02379	0.740286	0.337662	0.330775	0.0689
	1.00017	1.17343	0.779657	0.2963	0.307129	0.117138
	0.9923	0.976529	0.834771	0.3032	0.358337	0.0826875
	1.14191	1.12617	1.11829	0.454788	0.420337	0.062
	0.897786	0.8584	0.740271	0.26185	0.252	0.055125
	1.06316	1.07104	1.17341	0.379	0.358312	0.103375
	0.937157	1.07103	0.842657	0.392775	0.35145	0.0964625
Mean	0.969269	0.994103	0.930497	0.37763	0.36749	0.099576
SEM	0.0383585	0.0363002	0.0440543	0.019948	0.0189058	0.00873874

## Sheet: Figure.1G
Distance (uM)	Tom20 (Fluorescence)	Tom20 (Fluorescence SEM )	Distance (uM)	sAC (Fluorescence )	sAC (Fluorescence SEM )
0	0.00661813	0.00560335	0	0.00117578	0.0200862
0.0551	0.00582396	0.0058019	0.0551	0	0.0198168
0.1102	0.00357379	0.00644165	0.1102	0.00117578	0.0199148
0.1653	0.000529451	0.00637547	0.1653	0.00823045	0.01602
0.2204	0.00595632	0.0017869	0.2204	0.0198413	0.00805898
0.2755	0.0514891	0.0117362	0.2755	0.0380658	0.00301293
0.3306	0.168101	0.0336863	0.3306	0.0680482	0.00276798
0.3857	0.367704	0.0516656	0.3857	0.132569	0.00641779
0.4408	0.634547	0.0527245	0.4408	0.25485	0.0271654
0.4959	0.88233	0.0391352	0.4959	0.440182	0.0436753
0.551	1	0.0387602	0.551	0.61846	0.0460758
0.6061	0.946261	0.0502758	0.6061	0.739565	0.0440427
0.6612	0.773527	0.051092	0.6612	0.803792	0.0446796
0.7163	0.578557	0.0409662	0.7163	0.84274	0.047913
0.7714	0.437723	0.0308626	0.7714	0.866402	0.0492847
0.8265	0.368498	0.0234061	0.8265	0.891828	0.0487703
0.8816	0.352614	0.0197441	0.8816	0.902998	0.0438957
0.9367	0.355394	0.0202956	0.9367	0.931805	0.0404909
0.9918	0.365586	0.0238915	0.9918	0.967666	0.0438957
1.0469	0.397882	0.0297595	1.0469	1	0.0428914
1.102	0.481535	0.0365321	1.102	0.965168	0.0385802
1.1571	0.638518	0.0440326	1.1571	0.856114	0.0394131
1.2122	0.834017	0.0472094	1.2122	0.67769	0.0417157
1.2673	0.974322	0.0436356	1.2673	0.48545	0.0393641
1.3224	0.960953	0.043437	1.3224	0.326867	0.029223
1.3775	0.776175	0.0529671	1.3775	0.195326	0.0192779
1.4326	0.502713	0.0587249	1.4326	0.102587	0.0113169
1.4877	0.256784	0.0491727	1.4877	0.0489418	0.00240055
1.5428	0.0923891	0.0304875	1.5428	0.021458	0.007961
1.5979	0.02409	0.00917715	1.5979	0.00999412	0.0164854
1.653	0	0.00494154	1.653	0.00661376	0.0182981
1.7081	0.00132363	0.00664019	1.7081	0.00587889	0.0179796
1.7632	0.00370615	0.00650783	1.7632	0.00440917	0.0184695
1.8183	0.00344143	0.0067505	1.8183	0.00352734	0.0188125
1.8734	0.00383852	0.00683874	1.8734	0.00382128	0.0188615

## Sheet: Figure 1 - Figure supplament 1
Distance (uM)	ATP-synthase (Fluorescence )	ATP-synthase (Fluorescence SEM )	Distance (uM)	sAC (Fluorescence)	sAC (Fluorescence SEM )
0	0.000949539	0.00232863	0	0	0.0264528
0.0426	0.00081389	0.00219298	0.0426	0.00729927	0.029678
0.0852	0.000678242	0.00203473	0.0852	0.014938	0.0338369
0.1278	0.000135648	0.00198951	0.1278	0.0241046	0.0389577
0.1704	0	0.00189908	0.1704	0.0332711	0.0448141
0.213	0.00081389	0.00146952	0.213	0.0419284	0.0491145
0.2556	0.0044764	6.78242e-05	0.2556	0.0521134	0.0504159
0.2982	0.0206186	0.00567462	0.2982	0.0714649	0.0497086
0.3408	0.0642973	0.0197368	0.3408	0.113224	0.0526792
0.3834	0.13904	0.0405363	0.3834	0.18367	0.0617609
0.426	0.234943	0.0599114	0.426	0.275845	0.0731059
0.4686	0.358926	0.0680955	0.4686	0.376337	0.0787359
0.5112	0.499729	0.0650434	0.5112	0.480054	0.0781984
0.5538	0.641074	0.0591201	0.5538	0.589374	0.0773213
0.5964	0.763429	0.0551863	0.5964	0.702937	0.0800373
0.639	0.862995	0.0526994	0.639	0.811916	0.0834324
0.6816	0.935431	0.0496247	0.6816	0.904091	0.0849884
0.7242	0.981416	0.0468213	0.7242	0.969105	0.0822724
0.7668	0.994845	0.0468665	0.7668	0.997793	0.0729644
0.8094	0.987113	0.0488108	0.8094	1	0.0642506
0.852	0.965952	0.0472056	0.852	0.978442	0.0632038
0.8946	0.953066	0.0441083	0.8946	0.933797	0.0676456
0.9372	0.952523	0.0433171	0.9372	0.886267	0.0705313
0.9798	0.954422	0.0443118	0.9798	0.863351	0.0751995
1.0224	0.953608	0.0454196	1.0224	0.864539	0.0839133
1.065	0.950624	0.0470926	1.065	0.879986	0.0908165
1.1076	0.958356	0.0481552	1.1076	0.886267	0.091637
1.1502	0.982773	0.0498056	1.1502	0.860126	0.0875064
1.1928	1	0.0495117	1.1928	0.805636	0.0800091
1.2354	0.969072	0.0508455	1.2354	0.733662	0.0747751
1.278	0.85974	0.0574471	1.278	0.649296	0.0763028
1.3206	0.693163	0.0641165	1.3206	0.555424	0.0787925
1.3632	0.503527	0.0648852	1.3632	0.448481	0.0755672
1.4058	0.335187	0.0611548	1.4058	0.34018	0.0671646
1.4484	0.203608	0.0523603	1.4484	0.239688	0.0568947
1.491	0.115844	0.0373485	1.491	0.158547	0.0469077
1.5336	0.054395	0.020302	1.5336	0.098625	0.0382787
1.5762	0.0174986	0.00682764	1.5762	0.0578849	0.0321677
1.6188	0.00352686	6.78242e-05	1.6188	0.0312341	0.0285464
1.6614	0.00108519	0.00144692	1.6614	0.0178238	0.0263962
1.704	0.00135648	0.00124344	1.704	0.0159565	0.026085
1.7466	0.00257732	0.00101736	1.7466	0.0242743	0.0293668
1.7892	0.00298426	0.000926931	1.7892	0.0366661	0.0357891
1.8318	0.00284862	0.0011304	1.8318	0.0463419	0.0413625
1.8744	0.00298426	0.00124344	1.8744	0.0509251	0.0428903
