# Supplementary material for: Calcium and bicarbonate signaling pathways have pivotal, resonating roles in matching ATP production to demand
Source: eLife. 2023 Jun 5;12:e84204. doi: 10.7554/eLife.84204 (PMC10284600; doi:10.7554/eLife.84204)
Supplement: Figure 2—source data 1. [file elife-84204-fig2-data1.xlsx]

## Sheet: Figure.2A
	0 mM HCO3-		10 mM HCO3-		15mM HCO3-
Forskolin	-	+	-	+	-	+
	29.3563	35.9376	33.1422	40.3191	28.7039	49.3359
	29.0326	31.6224	42.4146	43.3771	61.0485	54.377
	30.6112	23.6251	53.585	40.3204	54.2318	46.9006
	33.7918	32.3474	39.3806	38.2545	46.07	41.9176
	29.5984	31.3089	45.3961	31.0708	76.4303	64.3611
	32.2719	20.2784	43.7762	33.9597	69.9627
Mean	30.777	29.1866	42.9491	37.8836	56.0745	51.3784
SEM	0.770312	2.42412	2.76278	1.86186	7.03471	3.81622
		d

## Sheet: Figure.2B-C
	0 mM HCO3-								10 mM HCO3-								15 mM HCO3-
IBMX	0	10	15	20	25	30	40	50	0	10	15	20	25	30	40	50	0	10	15	20	25	30	40	50
	2.53679	2.4301	2.41387	2.45189	2.38952	2.45736	2.50742	2.69733	2.963	2.86189	2.9006	3.13801	3.0607	3.01565	3.14813	3.27196	3.08492	2.91952	3.06383	3.27023	3.02742	3.35034	3.23528	3.46391
	2.38035	2.27603	2.20753	2.37733	2.3319	2.45077	2.49497	2.73617	3.10745	2.96602	3.01185	2.15277	3.09664	2.67732	3.19269	3.24892	2.97557	2.85512	2.84256	3.11958	2.91239	3.33013	3.26783	3.47453
	2.16556	2.13196	2.04952	2.0615	2.17547	2.14533	2.28837	2.42486	2.63161	2.66924	2.53667	2.68613	2.77093	2.97495	3.04701	3.00474	2.85744	2.75772	2.79013	3.02095	4.16308	3.27405	3.78022	3.31121
	1.99437	1.92017	1.90841	2.00748	2.11471	2.17742	2.15391	1.81619	2.66857	2.58745	2.70296	2.87995	2.86845	2.90971	3.14776	3.07018	2.77572	3.07171	2.66625	2.88804	4.15734	4.36813	3.37575	4.08374
	2.14675	1.9604	1.97771	2.02312	2.08344	2.12181	2.16654	2.45204	2.74262	2.6145	2.74488	2.80599	2.85137	2.86464	3.10308	3.26435	3.20989	3.63645	3.46418	3.9932	3.81775	4.17528	4.33633	3.91456
	1.99958	1.87016	1.89309	1.90613	2.07824	2.12371	2.07245	2.25365	2.81717	2.65779	2.82524	2.87096	2.82611	2.85593	3.02041	3.27551	2.97358	3.38245	3.57101	3.89721	2.89997	4.22859	4.32181	3.80098
	1.92601	1.87823	1.88783	1.97134	1.77385	2.04594	2.14272	2.21097	2.80228	2.93395	2.81824	2.84716	2.76669	2.93716	3.01528	3.16881	3.61165	3.20204	3.9643	3.84758	4.76865	4.59093	4.37694	4.50001
	1.75987	1.75154	1.73054	1.75526	1.82647	1.93761	1.94502	1.94083	2.662	2.32236	2.65364	2.60241	2.66536	3.08423	2.89986	3.00309	3.40278	4.37829	3.70381	4.09863	4.66445	4.49615	4.47641	4.69438
	2.91737	2.54787	2.57868	2.57723	2.77172	2.58183	2.77796	2.96167	3.19301	2.49312	2.38013	2.98108	3.00337	3.43657	3.2125	3.43036	3.26394	4.37388	3.52055	3.85688	4.61328		4.59418	4.61266
	1.80124	1.97017	2.00516	2.10023	2.38376	2.38197	2.67558	3.125	2.26093	2.41412	2.66028	2.75185	2.85982	2.86103	3.44505	3.74955	4.29704	4.2236	4.60529	3.94471	4.48223		4.40436	4.77553
	1.95981	2.11341	2.07404	2.34642	2.64652	2.63822	2.95495	3.25192	2.36822	3.19226	2.41339	3.01555	3.11733	3.38108	3.67124	3.93182	4.27984		4.48284	4.72522	4.54649			4.55513
	2.26883	2.14279	2.12142	2.18902	2.29753	2.14223	2.37399	2.6148	2.59179	2.61164	3.32326	2.58156	2.64276	3.63073	2.96572	3.11625	4.30311		4.41155	4.65477	4.44735			4.46742
	2.28584	2.11212	2.24158	2.40056	2.25889	2.5042	2.57364	2.87212	3.46462	2.45145	2.95619	3.4407	3.58618	3.50543	3.48126	3.56737	3.9176			4.46263
	2.07373	2.10176	2.17312	2.40683	2.25955	2.59541	2.51964	2.79187	2.62617		2.7539	3.39427	3.69862	3.32371	3.76793	4.01092				3.87379
	1.56309	1.70055	1.83514	2.25002	2.22702	2.60936	2.8071	3.16404	2.50166		2.62845	3.22591	3.50821		3.76343	3.93675
	1.91573	1.819	2.01514	2.19364	2.06187	2.25886	2.35064	2.52062	2.44449			3.07902	3.37276		3.52528	3.65193
Mean	2.10593	2.04539	2.06955	2.18863	2.23003	2.32325	2.42531	2.61463	2.74035	2.67506	2.75398	2.90333	3.04345	3.10415	3.27541	3.41891	3.45793	3.48008	3.59053	3.83239	4.0417	3.9767	4.01691	4.13784
SEM	0.0817891	0.058689	0.0546117	0.0568682	0.0643119	0.0573109	0.0724108	0.105362	0.0789144	0.0691232	0.061816	0.0811431	0.0831987	0.078607	0.0726235	0.0861845	0.157372	0.201746	0.194734	0.154797	0.204908	0.198535	0.171862	0.153235
		d

## Sheet: Figure.2D-G
Distance (uM)	TOM20 (Fluorescence )	TOM20 (Fluorescence SEM )	Distance (uM)	CA14 (Fluorescence)	CA14 (Fluorescence SEM )			Distance (uM)	sAC (Fluorescence )	sAC (Fluorescence SEM )	Distance (uM)	CA14 (Fluorescence)	CA14 (Fluorescence SEM )
0	0.0281348	0.0285007	0	0.0119596	0.0188637			0	0	0.0196485	0	0	0.0176191
0.0551	0.0460325	0.0228973	0.0551	0.0175228	0.0167561			0.0551	0.00551505	0.0192738	0.0551	0.00550851	0.0170865
0.1102	0.083976	0.0161913	0.1102	0.0221283	0.0146078			0.1102	0.0143099	0.0186569	0.1102	0.0147132	0.0164271
0.1653	0.151375	0.00818844	0.1653	0.0263608	0.0130837			0.1653	0.0282415	0.0173659	0.1653	0.0290887	0.0152864
0.2204	0.261922	0.00143821	0.2204	0.0374982	0.0106276			0.2204	0.0493987	0.014858	0.2204	0.0493319	0.0130581
0.2755	0.420382	0.000359097	0.2755	0.0596712	0.00112577			0.2755	0.0803441	0.0110254	0.2755	0.0768255	0.00924983
0.3306	0.613559	0.00552594	0.3306	0.10012	0.00996463			0.3306	0.125891	0.00615659	0.3306	0.11717	0.00396382
0.3857	0.804981	0.0184506	0.3857	0.164769	0.0156876			0.3857	0.18987	0.000642088	0.3857	0.175983	0.00179035
0.4408	0.946518	0.0303867	0.4408	0.260591	0.01964			0.4408	0.273233	0.0043938	0.4408	0.257077	0.00693053
0.4959	1	0.0313892	0.4959	0.390348	0.0259769			0.4959	0.3735	0.00831538	0.4959	0.359811	0.0116556
0.551	0.953888	0.0282062	0.551	0.548144	0.0309694			0.551	0.48643	0.0114299	0.551	0.477985	0.0154363
0.6061	0.840964	0.0261296	0.6061	0.706568	0.028399			0.6061	0.599851	0.0128285	0.6061	0.595539	0.0172353
0.6612	0.704648	0.0275721	0.6612	0.832282	0.0212185			0.6612	0.703251	0.0113786	0.6612	0.700305	0.0168103
0.7163	0.588196	0.0310196	0.7163	0.921934	0.0185017			0.7163	0.793772	0.00748765	0.7163	0.793054	0.0157162
0.7714	0.502124	0.0317866	0.7714	0.970002	0.0166167			0.7714	0.871505	0.00183042	0.7714	0.870497	0.0125174
0.8265	0.444776	0.0303389	0.8265	0.994999	0.0104307			0.8265	0.934906	0.00466818	0.8265	0.929889	0.00668053
0.8816	0.406206	0.0287121	0.8816	1	0.00796351			0.8816	0.982159	0.00744252	0.8816	0.970575	0.00056241
0.9367	0.381269	0.0280364	0.9367	0.995	0.00914188			0.9367	1	0.00368467	0.9367	0.992408	0.00430066
0.9918	0.367909	0.0290132	0.9918	0.997911	0.0118471			0.9918	0.986624	0.00217798	0.9918	1	0.004745
1.0469	0.368198	0.0318554	1.0469	0.985565	0.0165621			1.0469	0.94574	0.00786545	1.0469	0.979878	0.000623955
1.102	0.388897	0.0355021	1.102	0.955624	0.0233044			1.102	0.887758	0.0126666	1.102	0.931282	0.006875
1.1571	0.432859	0.0355521	1.1571	0.914716	0.0271356			1.1571	0.82045	0.0160048	1.1571	0.862063	0.0122616
1.2122	0.500716	0.0309117	1.2122	0.87003	0.0290863			1.2122	0.748485	0.0186504	1.2122	0.785331	0.0162056
1.2673	0.585776	0.0243448	1.2673	0.832822	0.0337192			1.2673	0.671352	0.0204672	1.2673	0.701903	0.018338
1.3224	0.680834	0.0196207	1.3224	0.776378	0.0347825			1.3224	0.586468	0.0217052	1.3224	0.614044	0.0206237
1.3775	0.774008	0.0193489	1.3775	0.676926	0.0321637			1.3775	0.493379	0.0206578	1.3775	0.519473	0.0221645
1.4326	0.84003	0.022036	1.4326	0.538296	0.0315127			1.4326	0.395616	0.0164629	1.4326	0.420642	0.0209084
1.4877	0.846087	0.0214794	1.4877	0.391839	0.0297453			1.4877	0.30107	0.00977582	1.4877	0.325199	0.016512
1.5428	0.772927	0.0131464	1.5428	0.264908	0.0219843			1.5428	0.217482	0.00213393	1.5428	0.241157	0.00957739
1.5979	0.626665	0.00660895	1.5979	0.165454	0.0123413			1.5979	0.151773	0.00495531	1.5979	0.172426	0.00223939
1.653	0.444838	0.00685196	1.653	0.0934194	0.00563288			1.653	0.104879	0.0102371	1.653	0.120112	0.00441842
1.7081	0.276807	0.0124025	1.7081	0.0490852	0.00129507			1.7081	0.0721644	0.0139001	1.7081	0.0811369	0.00986168
1.7632	0.151533	0.0200547	1.7632	0.0264637	0.00283333			1.7632	0.0486035	0.016153	1.7632	0.053	0.0135517
1.8183	0.0721947	0.0272051	1.8183	0.0179053	0.00740586			1.8183	0.0321821	0.0171306	1.8183	0.0341158	0.0151596
1.8734	0.0286701	0.0328522	1.8734	0.012091	0.0122976			1.8734	0.0214872	0.0173402	1.8734	0.0224369	0.0150245
1.9285	0.00710028	0.036875	1.9285	0.00602466	0.0172226			1.9285	0.0143899	0.0173047	1.9285	0.0155295	0.0144508
1.9836	0	0.0404904	1.9836	0	0.0217283			1.9836	0.00876013	0.0171867	1.9836	0.0102472	0.014327
