# Supplementary material for: Calcium and bicarbonate signaling pathways have pivotal, resonating roles in matching ATP production to demand
Source: eLife. 2023 Jun 5;12:e84204. doi: 10.7554/eLife.84204 (PMC10284600; doi:10.7554/eLife.84204)
Supplement: Figure 4—source data 1. [file elife-84204-fig4-data1.xlsx]

## Sheet: Figure.4B-C
	Left (Low Calcium)					Middle					right (High Calcium)
	Control	8Br-cAMP	8Br-cAMP+H89	8Br-cAMP+CE3F4		Control	IBMX	8Br-cAMP	8Br-cAMP +IBMX		Control	8Br-cAMP	8Br-cAMP+H89	8Br-cAMP+CE3F4
	2.5347	2.07861	2.05306	1.95435		2.00419	2.07967	1.86756	2.06638		5.89047	4.8073	4.49166	3.75556
	2.43923	1.93861	2.10513	1.90461		1.93685	2.18148	1.75328	2.21095		5.41349	4.40653	4.16831	3.52057
	2.41624	2.08664	2.07399	1.89465		2.05384	2.02842	1.95703	2.20731		5.7109	4.68091	4.21383	3.58504
	2.2357	1.81314	1.98449	1.71317		2.0654	2.01834	1.88312	2.06638		5.48362	4.60876	4.33212	3.83539
	2.92681	2.77791	2.72421	2.53432		2.00419	2.07967	1.86756	2.21095		5.9177	5.13234	4.82872	3.98063
	3.02458	2.64573	2.45527	2.18791		1.93685	2.18148	1.75328	2.20731		4.49516	4.22669	4.29889	3.45476
	2.84526	2.37992	2.25666	2.12049		2.05384	2.02842	1.95703	2.33465		5.17871	3.35626	4.31325	3.44824
	2.67542	2.22239	2.24859	2.01157		2.0654	2.01834	1.88312	2.32523		4.63029	4.40188	4.12305	3.12071
	2.51417	1.98797	1.84737	1.88544		1.89412	2.07802	2.01112	2.32906		4.44342	4.32844	3.85181	3.56823
	2.30855	1.98178	1.75162	1.70938		1.91907	2.1425	1.95717	2.47322		4.36387		3.72714	3.32258
	2.26864	2.37259	1.68405	1.71376		1.85025	2.06095	1.94514	2.26918		4.63861		3.66158	3.43909
	2.22313		1.8628	1.80098		2.02955	2.28745	2.12964	2.03787		4.56438		3.6829	3.46441
						1.96249	2.28216	1.89513	2.02249
						1.97231	2.08351	1.87309	1.96939
						1.9943	2.10313	1.75806
						1.95026	2.12377	1.64818
Mean	2.53437	2.20775	2.08727	1.95255		1.98081	2.11108	1.88372	2.19503		5.06088	4.43879	4.1411	3.54127
SEM	0.0798654	0.0920864	0.0866572	0.0692015		0.0160993	0.0212822	0.0290605	0.0389839		0.173187	0.163969	0.102545	0.0666128
		d
