# Supplementary material for: Calcium and bicarbonate signaling pathways have pivotal, resonating roles in matching ATP production to demand
Source: eLife. 2023 Jun 5;12:e84204. doi: 10.7554/eLife.84204 (PMC10284600; doi:10.7554/eLife.84204)
Supplement: Figure 6—source data 1. [file elife-84204-fig6-data1.xlsx]

## Sheet: Figure.6C-D
															Posterior wall						Septum
	Ejection fraction				Fractional shortening				LVID diastolic		LVID systolic				Sham			Post-MI			Sham			Post-MI
Percent (%)	sham	Post-MI		Fraction	sham	Post-MI			sham	Post-MI	sham	Post-MI			Control	cAMP	High Calcium	Control	cAMP	High Calcium	Control	cAMP	High Calcium	Control	cAMP	High Calcium
	60.7301	57.667			0.336788	0.319079			7.75016	9.40679	5.14	6.40528			3.21442	3.31236	6.56789	3.75521	4.81005	5.69138	3.22781	2.65135	6.41137	3.60307	4.53442	5.77943
	64.5294	34.8142			0.364238	0.174863			7.45563	9.03562	4.74	7.45563			3.29926	3.5136	5.54063	3.88025	5.08787	4.86883	3.18225	2.93738	6.13953	3.81427	5.08291	5.95979
	68.4474	61.4335			0.395349	0.346561			7.48738	9.48109	4.52725	6.19531			3.59899	4.12159	6.73693	4.1339	5.40741	5.64173	3.16188	4.19913	6.03025	4.23249	5.49035	6.20658
	65.1885	21.6134			0.375566	0.105263			9.62041	10.8625	6.00731	9.71908			3.25361	4.97382	5.45541	4.73331	6.02954	6.00074	3.27529	3.84047	5.50522	4.73462	6.12497	6.32686
	69.0471	21.2085			0.404494	0.102679			8.78875	10.129	5.23375	9.08897			3.236	4.31671	6.27775	4.13674	6.63395	6.97352	3.05138	4.21467	5.86975	4.45735	6.97055	7.08392
	84.6874	42.5076			0.558242	0.219388			8.65099	8.86287	3.82165	6.91847			3.50177	4.542	6.11735	4.30078	6.76025	6.74887	2.75428	4.89984	5.72121	4.90933	7.54976	6.61666
															3.03321	5.13411	5.87834	4.84538	7.58522	6.74454	2.80837	2.91665	5.7111	5.3585	4.33794	6.46928
															2.80582	2.63965	6.14342	5.84173	5.03935	6.43173	3.14347	3.12315	5.78998	5.9116	4.92788	6.23515
															2.81954	3.08466	4.55535	4.42592	5.54347	4.92888	2.33365	3.65651	4.22498	4.34157	5.16543	5.77042
															3.22942	3.36704	4.64549	4.46075	5.70013	5.70372	2.46913	2.96631	4.50781	4.52367	5.08193	5.5671
															1.96595	3.89662	4.74895	4.60904	5.34023	5.70539	2.67479	3.18415	4.72158	4.44686	4.01536	4.96665
															2.03253	2.7138	4.35612	4.63616	4.35189	5.12619	2.99862	3.67976	4.79207	4.47602	4.50082	5.24179
															2.35785	2.88604		3.40879	5.02451			4.13862		3.23578	5.25953
															2.55541	3.25745		4.15975	6.15911					3.64857	5.94651
																3.55627								4.27551
																								4.94754
Mean	68.7717	39.874			0.405779	0.211305			8.29222	9.62965	4.91166	7.63046			2.9217	3.68771	5.5853	4.38055	5.67664	5.88046	2.92341	3.56984	5.45207	4.4323	5.35631	6.01864
SEM	3.41073	7.06114			0.0320175	0.0425626			0.355004	0.304511	0.301204	0.594076			0.139062	0.202757	0.240343	0.154824	0.234153	0.207189	0.0899766	0.185705	0.204582	0.174227	0.267221	0.172088
		d

## Sheet: Figure 6 Figure supplament 1
	Circumferential Strain															Longitudinal Strain
	1		2		3		4		5		6		7			1		2		3		4		5		6		7
	-5.9819	-8.1867	-8.432	-5.5254	-6.4612	-1.0069	-15.0696	-22.5279	-22.385	-13.4205	-15.2924	-12.1857	-12.1567	-8.6699		-10.77	-6.4514	-12.2397	-14.6999	-20.0181	-8.3985	-9.7881	-9.7977	-15.7048	-6.3173	-18.2634	-7.3267	-14.1419	-8.3342
	-13.2222	-0.9217	-25.2555	-9.3347	-10.4079	-2.9961	-31.8503	-6.8897	-12.571	-8.5004	-14.1803	-0.4983	-17.4905	-4.6908		-17.4549	-7.4564	-18.5659	-9.5863	-32.9483	-13.8946	-10.5502	-0.1073	-13.3655	-4.6054	-16.142	-14.5444	-17.8179	-7.5181
	-22.2922	-3.9914	-18.9952	-14.6902	-21.4968	-8.1255	-9.2425	-13.3199	-7.0472	-10.9838	-10.3348	-6.8666	-14.6382	-9.5861		-14.9294	-10.0719	-20.4275	-13.1416	-32.3975	-15.2932	-16.4568	-6.4449	-17.4742	-4.6036	-21.49	-10.3167	-15.5441	-9.827
	-26.4619	-1.1803	-20.7576	-6.5746	-27.6059	-3.2502	-27.5257	-2.256	-5.5089	-7.2772	-11.6778	-0.6875	-19.923	-2.8782		-17.195	-10.7675	-15.7253	-6.4108	-22.3952	-3.5144	-16.4715	-3.8065	-12.993	-2.7458	-15.3921	-1.2325	-17.8459	-4.7256
	-11.3994	-1.7622	-22.6075	-5.55	-14.1136	-8.7126	-23.3374	-19.476	-15.3194	-8.9748	-14.8255	-0.1441	-16.7949	-6.9078		-10.3791	-6.048	-15.5096	-7.3492	-12.8426	-1.1797	-12.265	-7.1869	-14.1475	-5.9297	-13.6902	-0.2089	-12.8964	-4.0707
	-13.6708	-9.731	-12.6993	-17.2696	-11.7419	-5.6995	-15.429	-18.7224	-20.4109	-9.8681	-12.0917	-9.7605	-13.8492	-11.496			-12.2956		-8.761	-42.1026	-9.3341		-1.5691		-2.3278	-22.3474	-8.712	-18.1859	-6.9356
Mean	-15.5047	-4.29555	-18.1245	-9.82408	-15.3046	-4.96513	-20.4091	-13.8653	-13.8737	-9.83747	-13.0671	-5.02378	-15.8087	-7.37147		-14.1457	-8.84847	-16.4936	-9.99147	-27.1174	-8.60242	-13.1063	-4.81873	-14.737	-4.4216	-17.8875	-7.05687	-16.072	-6.90187
SEM	3.06725	1.55224	2.59498	2.05475	3.19354	1.25242	3.50298	3.23442	2.80199	0.880153	0.808912	2.16194	1.14419	1.3063		1.52391	1.04225	1.404	1.33633	4.33168	2.26815	1.42833	1.49248	0.827616	0.661495	1.41305	2.23845	0.908329	0.889579
		d

## Sheet: Figure 6 Figure supplament 2
	Posterior wall												Septum
	Cv		Civ		Cii		Ci		TOM20				Cv		Civ		Cii		Ci		TOM20
	Sham	Post-MI	Sham	Post-MI	Sham	Post-MI	Sham	Post-MI	Sham	Post-MI			Sham	Post-MI	Sham	Post-MI	Sham	Post-MI	Sham	Post-MI	Sham	Post-MI
	1.12908	0.894262	1.1065	0.91865	1.14063	0.761608	1.08133	0.786302	0.78249	1.16038			1.0033	0.953343	0.96336	0.980191	1.00257	0.933133	1.08311	1.06281	0.972302	1.13072
	0.813833	0.800222	0.859239	0.858158	0.882404	0.84451	0.902174	0.835765	1.1604	1.14803			1.1041	1.2123	1.07842	1.38601	1.10077	1.37705	1.0409	1.24299	0.931575	0.766185
	0.921801	0.803409	0.875517	0.980678	0.929943	0.878246	0.973688	0.944872	1.0672	1.01352			0.867731	1.22178	0.893503	1.08458	0.932102	1.15154	0.930622	1.18141	1.02583	0.857529
	1.13529	0.649928	1.15874	0.798905	1.04702	0.766814	1.04281	0.783796	0.989916	1.22348			1.02487	0.99569	1.06472	1.03398	0.964561	1.09689	0.945369	1.03431	1.07029	0.920097
Mean	1	0.786955	1	0.889097	1	0.812795	1	0.837684	1	1.13635		Mean	1	1.09578	1	1.12119	1	1.13965	1	1.13038	1	0.918632
SEM	0.0794444	0.0506113	0.0773797	0.039107	0.0582558	0.0289021	0.0394856	0.0376794	0.0804444	0.0441519		SEM	0.0491265	0.0705678	0.0438008	0.0908088	0.0365457	0.091733	0.0369436	0.0492283	0.0303555	0.0774362
		d
