# Supplementary material for: Calcium and bicarbonate signaling pathways have pivotal, resonating roles in matching ATP production to demand
Source: eLife journal article supplement (doi:10.7554/elife.84204), 2023-06-05

Figure 3C\_ RAP1\_SourceData2

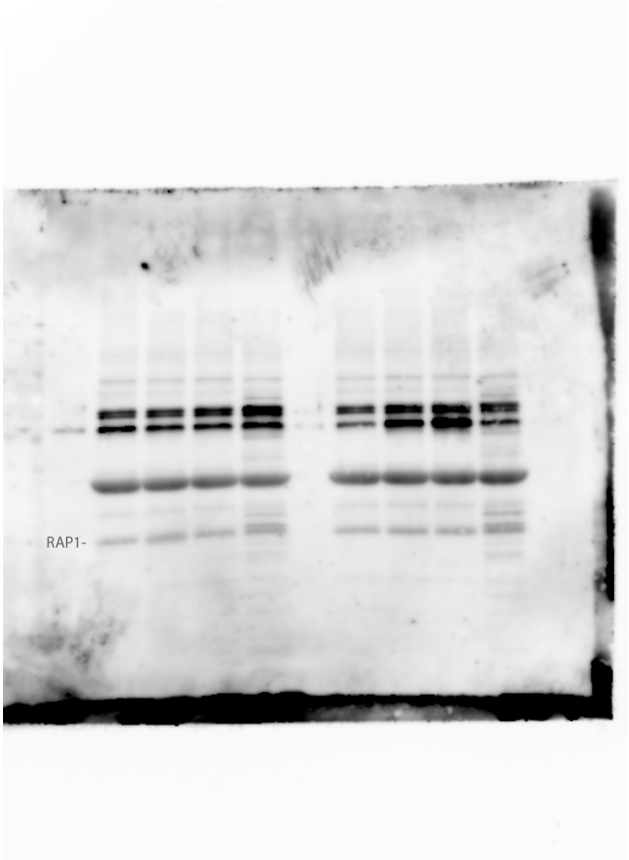

Figure 3C\_ RAP1\_SourceData3

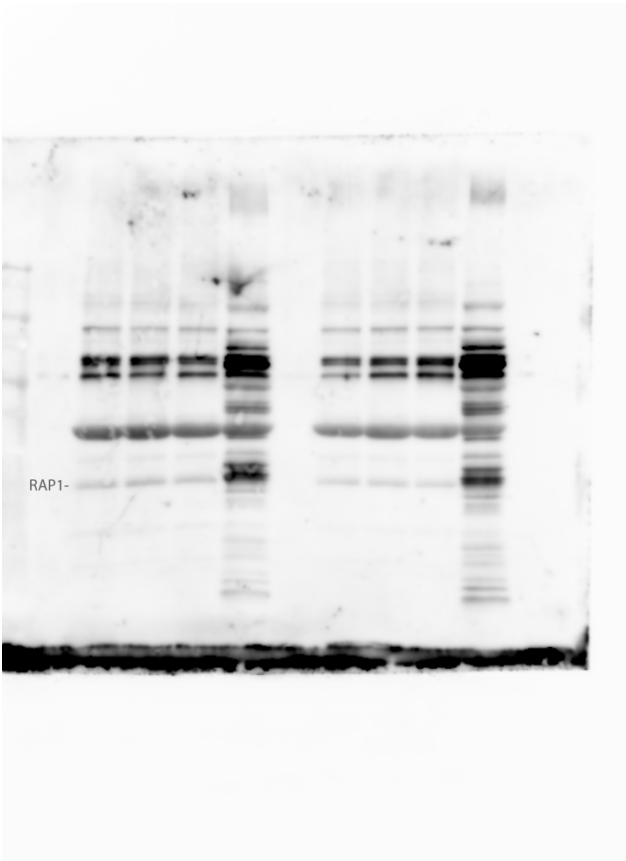

Figure 3C\_RAP1\_SourceData4

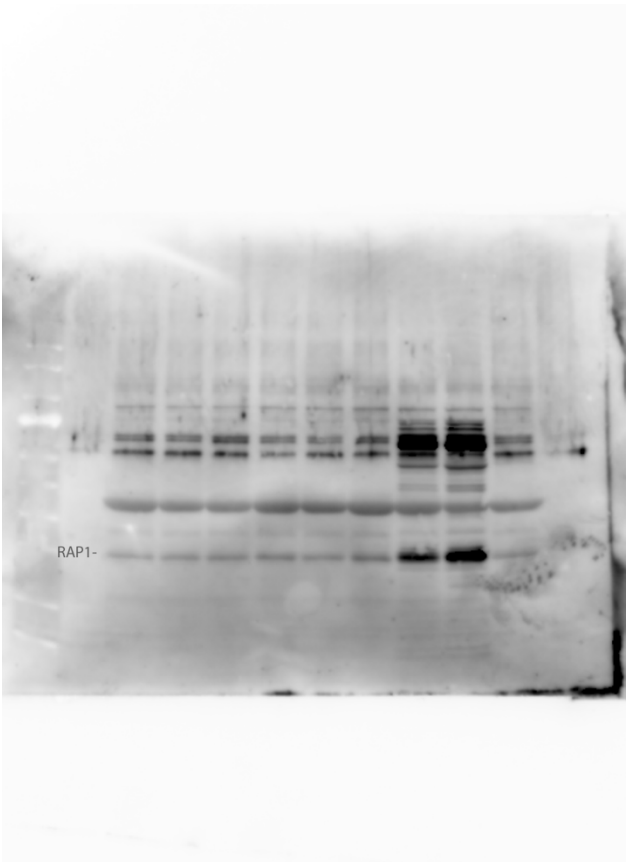

Figure 3C\_RAP1\_SourceData5

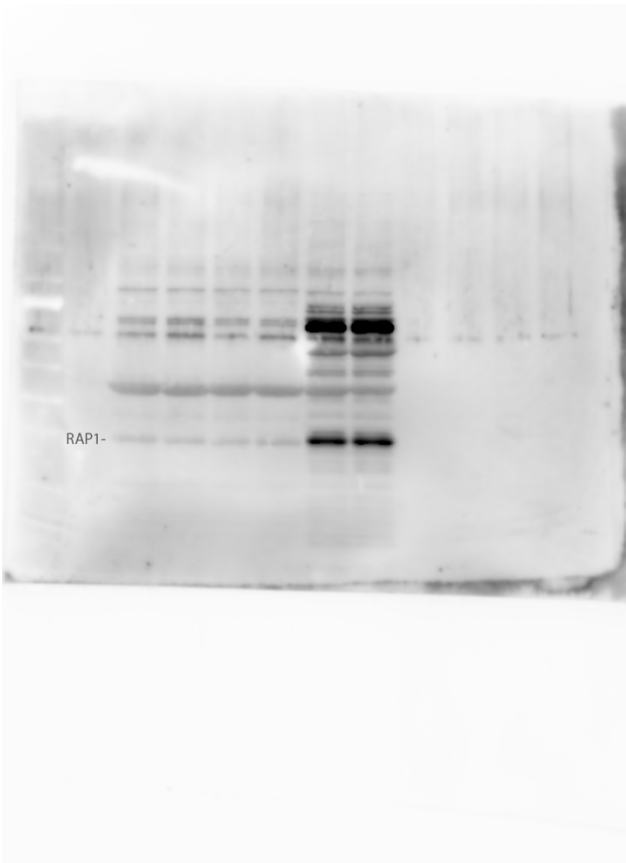

Supplement: supp [file elife-84204-supp-v1.zip]
