# Supplementary material for: Calcium and bicarbonate signaling pathways have pivotal, resonating roles in matching ATP production to demand
Source: eLife journal article supplement (doi:10.7554/elife.84204), 2023-06-05

Figure S3A - posterior wall - ETC (SourceData2)

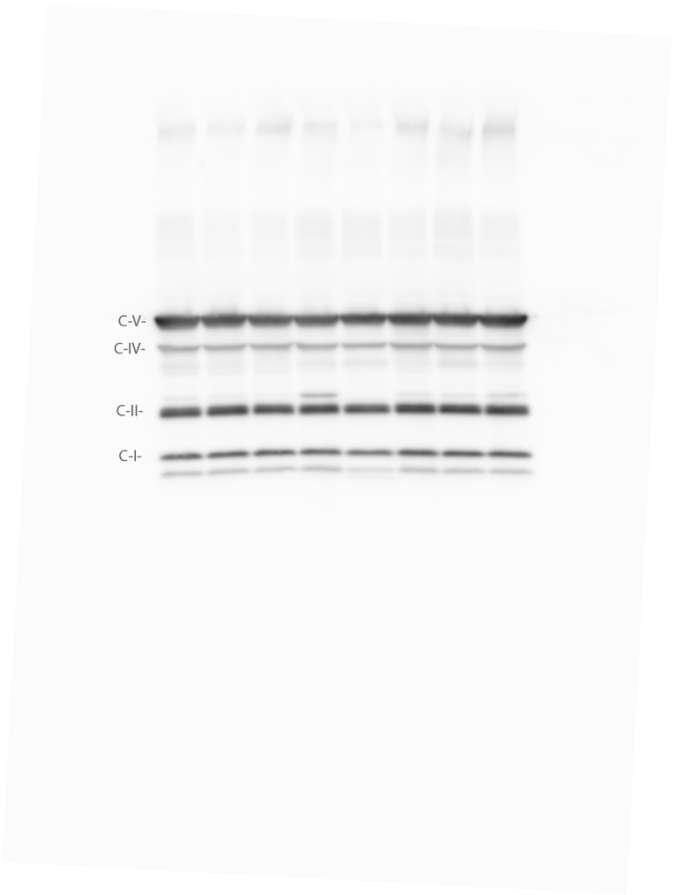

Figure S3A - posterior wall - Tom20 (SourceData3)

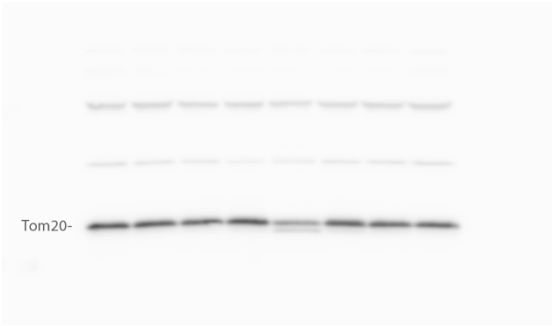

Figure S3A - Septal wall - ETC (SourceData4)

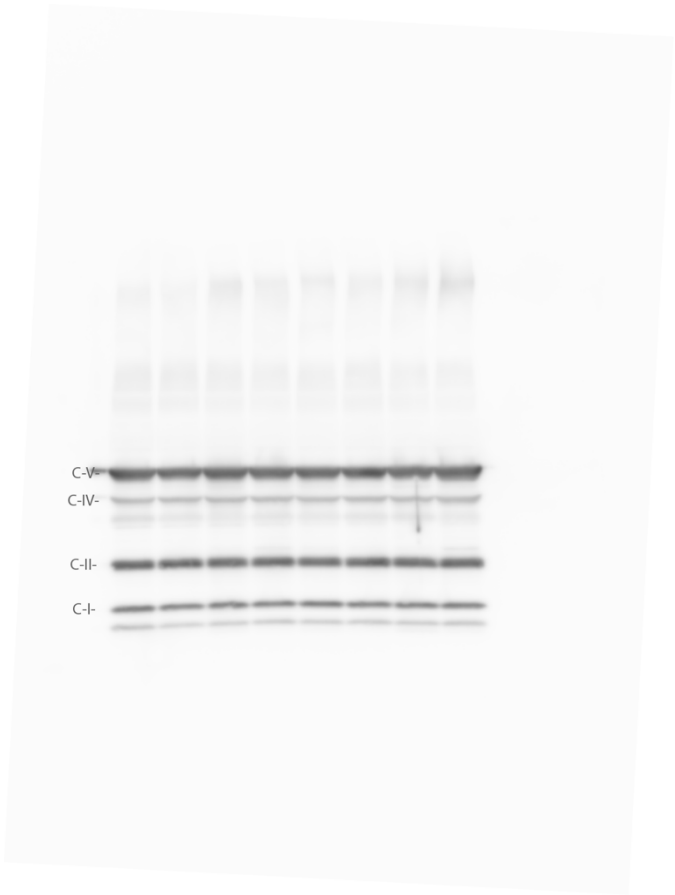

Figure S3A - Septal wall - Tom20 (SourceData5)

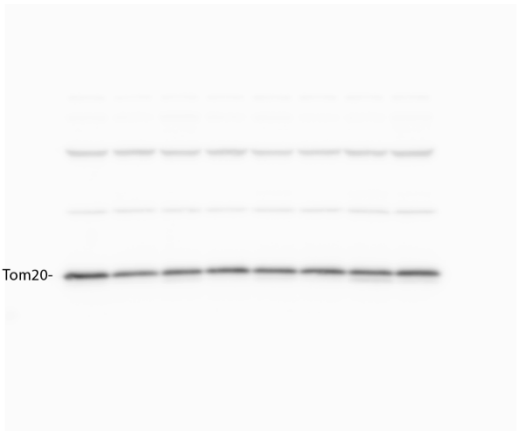

Supplement: supp [file elife-84204-supp-v1.zip]
