# Supplementary material for: Calcium and bicarbonate signaling pathways have pivotal, resonating roles in matching ATP production to demand
Source: eLife journal article supplement (doi:10.7554/elife.84204), 2023-06-05
Supplement: supp [file elife_poa_e84204_Figure_3_source_data_6.xlsx]

## Sheet: Figure.3A-B
	Left					Middle (Low Calcium)							Right (high Calcium)
	Control	IBMX	cAMP	cAMP +IBMX		Control	H89	CE3F4	cAMP	cAMP+H89	cAMP+CE3F4		Control	H89	CE3F4	cAMP	cAMP+H89	cAMP+CE3F4
	2.00419	2.07967	2.71276	3.26678		2.98956	3.03363	3.10289	4.53653	3.69152	2.53		6.19101	6.54038	6.19377	8.9452	8.38271	5.66901
	1.93685	2.18148	2.58582	3.1701		2.30459	2.44365	2.36847	3.17828	3.05864	2.3786		5.79552	6.50235	5.90982	7.00084	7.84938	5.7711
	2.05384	2.02842	2.75187	3.30652		2.15391	2.40375	2.33817	3.03108	2.87172	2.63584		6.07008	6.13194	5.88697	8.97836	8.16867	6.16642
	2.0654	2.01834	2.4769	3.18543		2.54735	2.79781	2.66208	3.07689	3.09919	2.33654		6.12242	6.31685	6.31473	7.7857	7.89166	5.63889
	2.00419	2.07967	2.71276	3.26678		2.29596	2.54022	2.46123	2.90821	2.93284	2.17091		6.16691	6.94992	6.18907	7.83408	6.99511	5.19258
	1.93685	2.18148	2.58582	3.1701		2.37193	2.6137	2.46534	2.717	2.77013	2.73792		6.77827	7.25106	6.1487	7.07467	7.12966	5.48148
	2.05384	2.02842	2.75187	3.30652		2.44327	2.84876	2.64139	3.05843	2.70305	2.59751		6.55552	6.58322	5.31638	7.24307	6.09584	4.69672
	2.0654	2.01834	2.4769	3.18543		2.37815	2.58487	2.39702	3.74044	3.01095	2.80208		4.96337	4.58387	4.04239	5.7724	5.30883	4.18375
	1.89412	2.07802	2.81485	3.54444		2.20578	2.49125	2.19011	3.12865	2.65844	2.92839		4.12022	3.99703	4.64183	7.3805	5.76218	3.26165
	1.91907	2.1425	2.94667	3.46787		2.28262	2.56367	2.25369	3.23116	3.83129	2.55531		5.31871	5.42381	4.82497	8.00661	5.63698	5.06612
	1.85025	2.06095	2.72306	3.39121		1.98329	2.21041	2.5044	2.6269	3.59039	3.07346		5.51316	5.49097	7.55228	8.49242	5.70514	4.939
	2.02955	2.28745	3.22249	3.76334		2.58582	3.07687	2.87145	3.16242	3.21408	3.10749		7.24349	3.73324	6.93495	8.72393	8.14188	4.64735
	1.96249	2.28216	3.30614	3.74904		2.79182	3.20067	3.1703	3.12772	4.3353			7.17345	7.94347	4.52496	8.39894	8.2138	5.0106
	1.97231	2.08351	3.11642	3.8034		2.75588	3.33244	3.10428	3.00777	3.34713			7.33608	7.32987	4.3439	8.6555	8.56607
	1.9943	2.10313	2.98904	3.65141		2.79734		3.17462	3.05421	1.83754			7.16125	7.92619
	1.95026	2.12377	2.94833	3.57693
Mean	1.98081	2.11108	2.82011	3.42533		2.45915	2.72441	2.64703	3.17238	3.13015	2.6545	#DIV/0!	6.1673	6.18028	5.63034	7.87802	7.13199	5.05574	#DIV/0!	#DIV/0!	#DIV/0!	#DIV/0!	#DIV/0!	#DIV/0!
SEM	0.0160993	0.0212822	0.0623867	0.056904		0.0723144	0.0886071	0.0901464	0.116474	0.152072	0.0836881	#DIV/0!	0.238914	0.337955	0.27764	0.244102	0.319178	0.211103	#DIV/0!	#DIV/0!	#DIV/0!	#DIV/0!	#DIV/0!	#DIV/0!
		d

## Sheet: Figure.3D
	cAMP
	1.17063
	0.925082
	1.24803
	0.954128
	1.54101
	1.99603
	1.38844
	1.27138
	1.20719
Mean	1.30021
SEM	0.107976
