# Supplementary figures and images for: Calcium and bicarbonate signaling pathways have pivotal, resonating roles in matching ATP production to demand
Source: eLife journal article supplement (doi:10.7554/elife.84204), 2023-06-05

**A.**

Isolated mitochondria

sAC

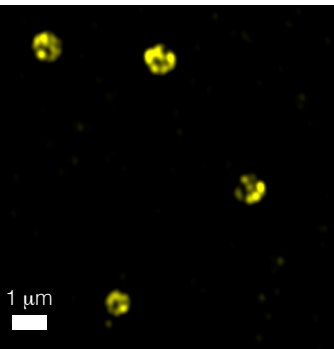

ATP Synthase

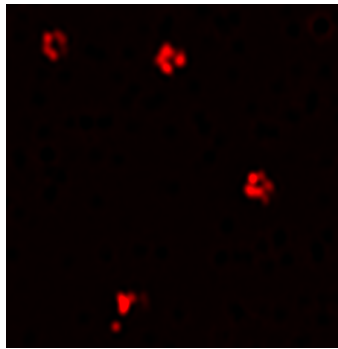

Merged

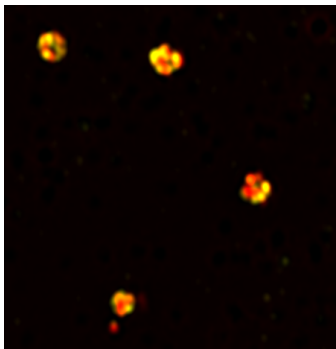**B.**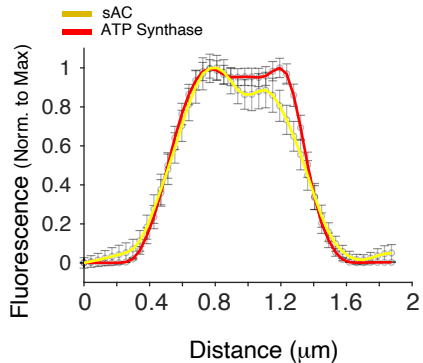

Supplement: supp [file elife-84204-supp-v1.zip]

**A.**

Isolated mitochondria

Confocal

CA-II

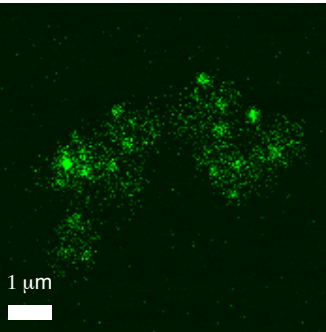

CA-Vb

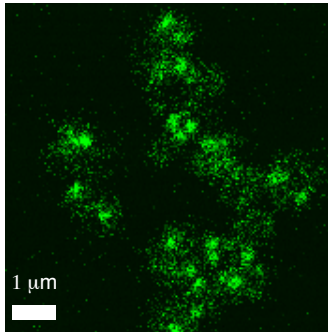

CA-XIV

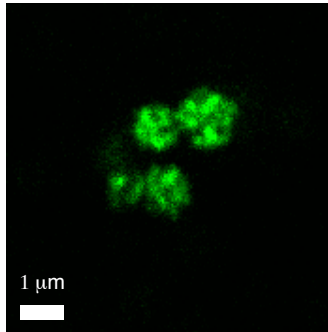**B.**

AiryScan

CA-XIV

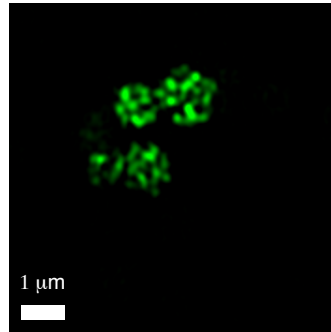

Supplement: supp [file elife-84204-supp-v1.zip]

# A Circumferential Strain (post-MI)

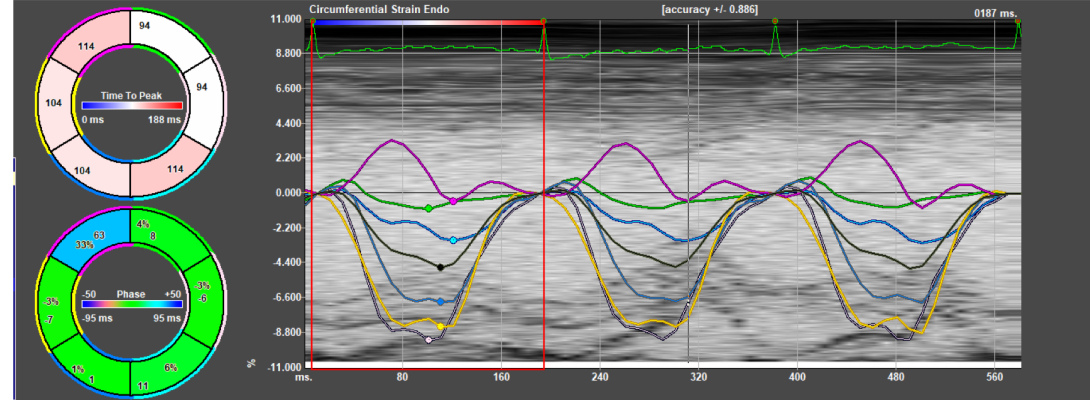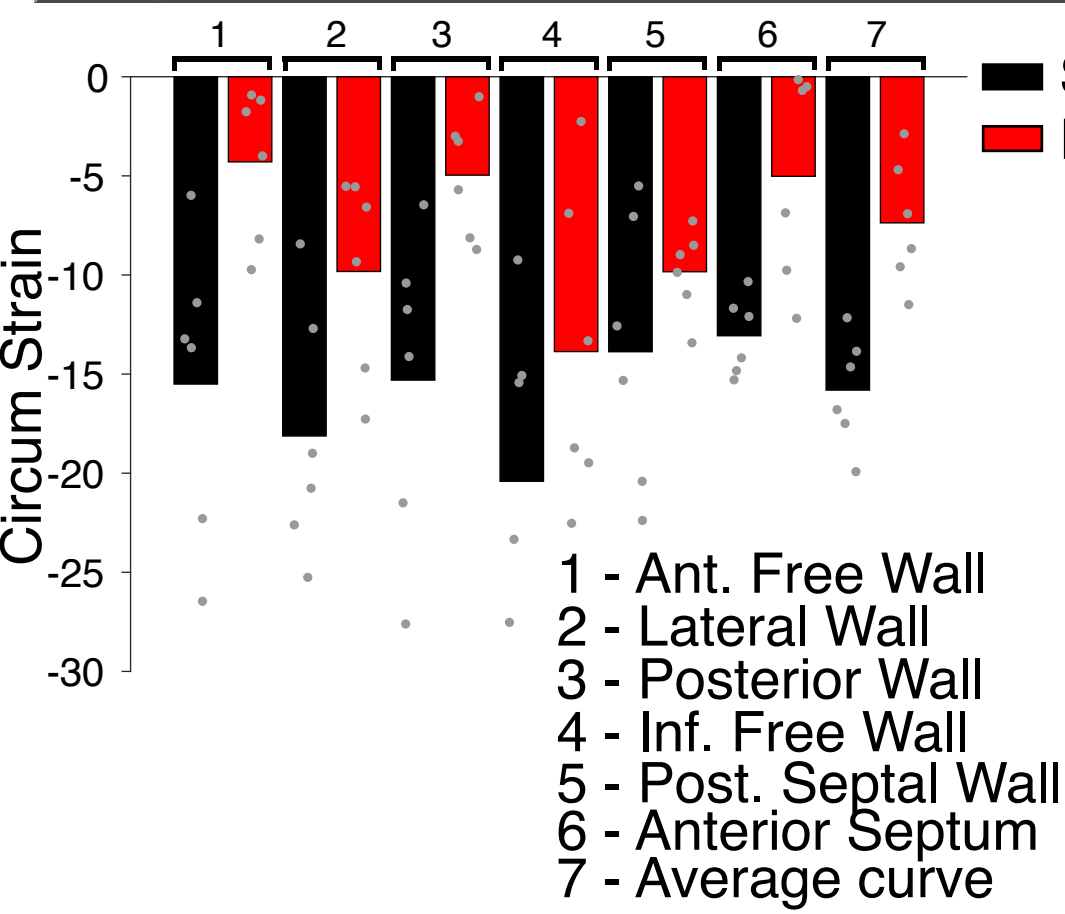

# B Longitudinal Strain (post-MI)

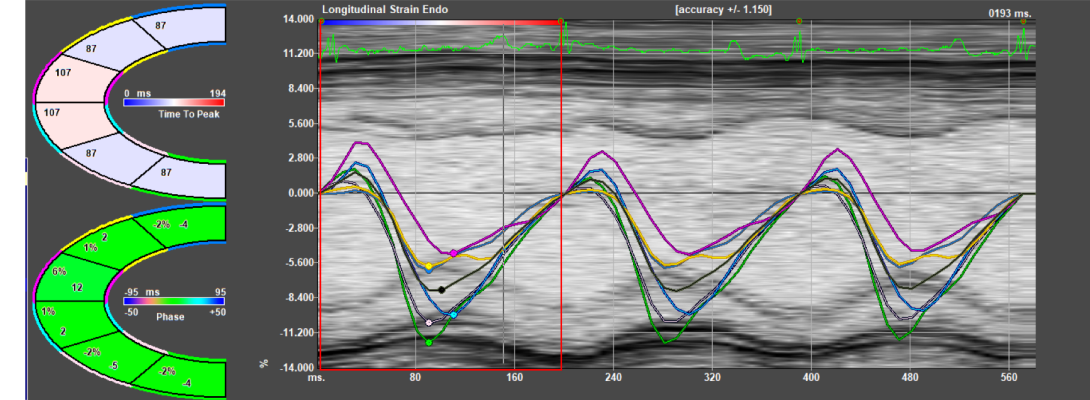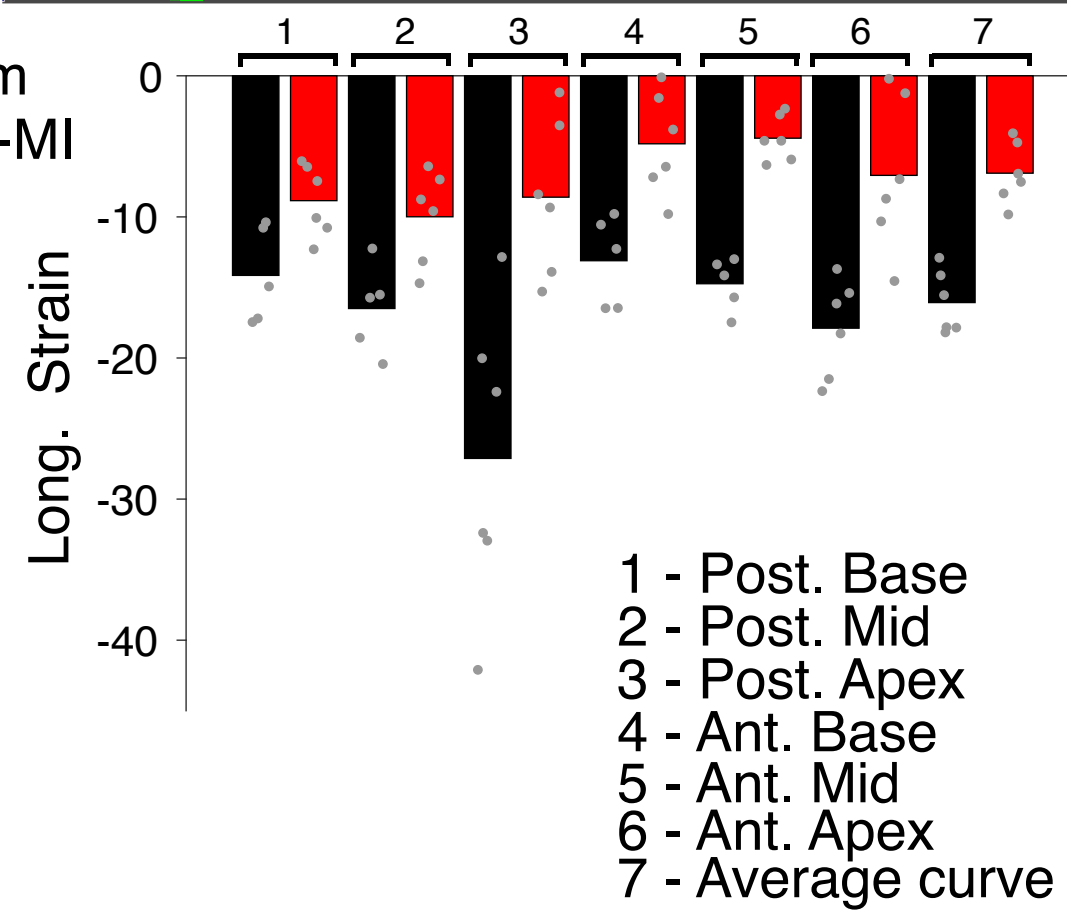

Supplement: supp [file elife-84204-supp-v1.zip]

**A**

Posterior wall

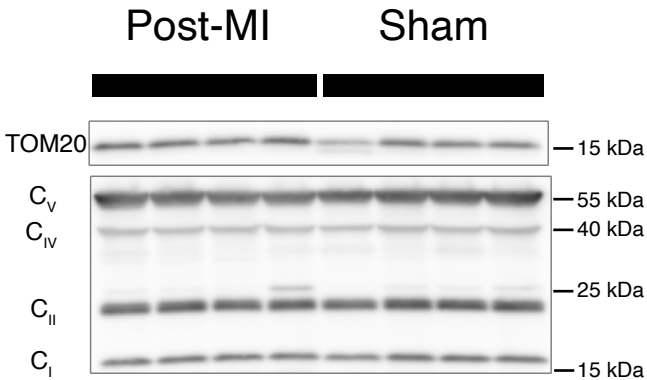**B**

Posterior wall

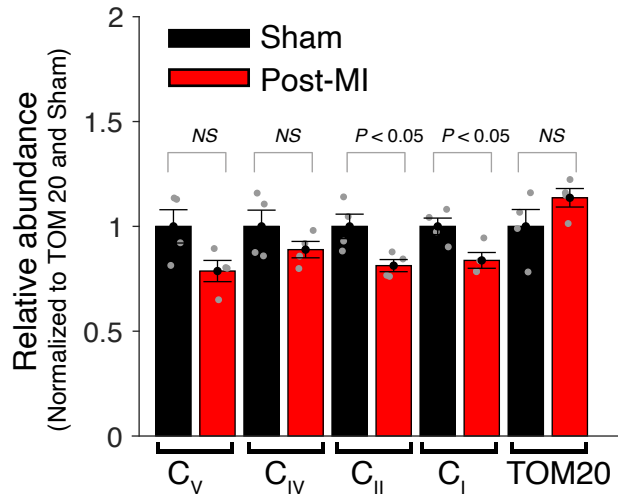**C**

Septum

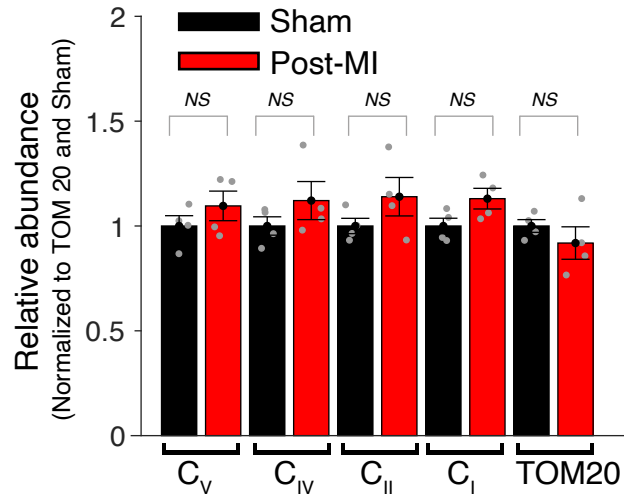

Supplement: supp [file elife-84204-supp-v1.zip]
